# Supplementary material for: Multidisciplinary Approach to Determine the Optimal Time and Period for Extracting the Essential Oil from Mentha suaveolens Ehrh
Source: PubMed Central journal article supplement (PMC6272612; doi:10.3390/molecules20069640), 2015-05-26
Supplement: molecules-20-09640-s001.pdf [file molecules-20-09640-s001.pdf]

# Supplementary Materials

**Table S1.** Anti-*Candida albicans* activities of the 18 TEOMS extracts.

| Sample <sup>1</sup> | Weighted MW <sup>2</sup> | MIC mg/mL | MIC (μmol/L) | pMIC (mol/L) <sup>3</sup> | PO %  |
|---------------------|--------------------------|-----------|--------------|---------------------------|-------|
| J1h                 | 166.67                   | 0.10      | 0.58         | 6.24                      | 87.25 |
| J2h                 | 168.06                   | 0.10      | 0.58         | 6.24                      | 70.59 |
| J3h                 | 170.89                   | 0.10      | 0.57         | 6.25                      | 65.56 |
| J6h                 | 186.44                   | 6.25      | 33.52        | 4.47                      | 26.03 |
| J12h                | 190.09                   | 6.25      | 32.88        | 4.48                      | 14.78 |
| J24h                | 193.27                   | 12.50     | 64.68        | 4.19                      | -     |
| A1h                 | 177.24                   | 0.10      | 0.55         | 6.26                      | 65.05 |
| A2h                 | 171.98                   | 0.02      | 0.14         | 6.86                      | 77.51 |
| A3h                 | 176.85                   | 0.10      | 0.55         | 6.26                      | 50.01 |
| A6h                 | 182.34                   | 0.78      | 4.28         | 5.37                      | 16.90 |
| A12h                | 180.01                   | 3.12      | 17.33        | 4.76                      | 2.43  |
| A24h                | 179.64                   | 6.25      | 34.79        | 4.46                      | -     |
| S1h                 | 175.85                   | 0.20      | 1.11         | 5.96                      | 38.69 |
| S2h                 | 175.05                   | 0.20      | 1.11         | 5.95                      | 35.64 |
| S3h                 | 165.42                   | 0.10      | 0.59         | 6.23                      | 69.52 |
| S6h                 | 182.69                   | 6.25      | 34.21        | 4.47                      | 13.20 |
| S12h                | 182.35                   | 6.25      | 34.28        | 4.47                      | 5.53  |
| S24h                | 180.18                   | 0.20      | 1.08         | 5.97                      | 5.61  |
| <b>Miconazole</b>   | 479.140                  | 0.016     | 0.033        | 7.48                      |       |

<sup>1</sup> Samples names were obtained by merging the month first letter and extraction time as reported in Table 1.

<sup>2</sup> Weighted MWs were calculated through a weighted sum of the chemical constituents' MW multiplied by their relative percentages. <sup>3</sup> pMIC =  $-\log_{10}(\text{MIC expressed in molar})$ .

**Table S2.** Chemical structures, names, MW and CAS Number of all 48 chemical constituents found in the 18 essential oils.

| # <sup>1</sup> | Chemical Structure and Name                                                                            | MW     | CAS           | # <sup>1</sup> | Chemical Structure and Name                                                                                   | MW     | CAS        |
|----------------|--------------------------------------------------------------------------------------------------------|--------|---------------|----------------|---------------------------------------------------------------------------------------------------------------|--------|------------|
| 1              | 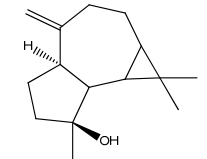<br>(-)-spathulenol | 220.35 | 77171-55-2    | 25             | <br>β-caryophyllene oxide | 220.35 | 1139-30-6  |
| 2              | <br>(z)-jasmone     | 164.25 | 488-10-8      | 26             | <br>cinerolone            | 166.22 | 17190-74-8 |
| 3              | <br>2-caren-10-al   | 150.22 | Not available | 27             | <br>citronellyl acetate   | 198.31 | 150-84-5   |

Table S2. Cont.

| # <sup>1</sup> | Chemical Structure and Name                                                                                   | MW     | CAS        | # <sup>1</sup> | Chemical Structure and Name                                                                               | MW     | CAS        |
|----------------|---------------------------------------------------------------------------------------------------------------|--------|------------|----------------|-----------------------------------------------------------------------------------------------------------|--------|------------|
| 4              | 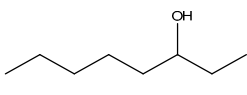<br>3-octanol                | 130.23 | 589-98-0   | 28             | <br>copaene             | 204.36 | 3856-25-5  |
| 5              | <br>3-octanol acetate        | 172.27 | 4864-61-3  | 29             | <br>cubenol             | 222.37 | 21284-22-0 |
| 6              | <br>$\alpha$ -cadinene       | 204.36 | 24406-05-1 | 30             | <br>d-limonene          | 136.23 | 5989-27-5  |
| 7              | <br>$\alpha$ -cadinol       | 222.37 | 481-34-5   | 31             | <br>$\delta$ -cadinene | 204.36 | 483-76-1   |
| 8              | <br>$\alpha$ -cubebene     | 204.36 | 17699-14-8 | 32             | <br>demelverine x     | 239.36 | 13977-33-8 |
| 9              | <br>$\alpha$ -muurolene    | 204.35 | 31983-22-9 | 33             | <br>eucalyptol        | 154.25 | 470-82-6   |
| 10             | <br>$\alpha$ -farnesene    | 204.35 | 502-61-4   | 34             | <br>eucarvone         | 150.22 | 503-93-5   |
| 11             | <br>$\alpha$ -phellandrene | 136.23 | 99-83-2    | 35             | <br>eugenol           | 164.20 | 97-53-0    |

Table S2. Cont.

| # <sup>1</sup> | Chemical Structure and Name                                                                                  | MW     | CAS        | # <sup>1</sup> | Chemical Structure and Name                                                                                | MW     | CAS        |
|----------------|--------------------------------------------------------------------------------------------------------------|--------|------------|----------------|------------------------------------------------------------------------------------------------------------|--------|------------|
| 12             | 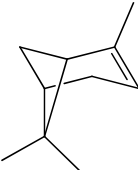<br>$\alpha$ -pinene        | 136.23 | 80-56-8    | 36             | <br>gamma-cadinene       | 204.36 | 1460-97-5  |
| 13             | <br>$\beta$ -bourbonene     | 204.35 | 5208-59-3  | 37             | <br>p-cymen-8-ol         | 150.22 | 1197-01-9  |
| 14             | <br>p-cymenene              | 132.20 | 1195.32.0  | 38             | <br>$\alpha$ -terpineol  | 154.25 | 98-55-5    |
| 15             | <br>$\beta$ -elemene       | 204.35 | 515-13-9   | 39             | <br>p-menthone          | 154.25 | 21060-23-1 |
| 16             | <br>$\beta$ -myrcene      | 136.23 | 123-35-3   | 40             | <br>piperitenone oxide | 166.22 | 35178-55-3 |
| 17             | <br>$\beta$ -ocymene      | 136.23 | 13877-91-3 | 41             | <br>tau-cadinol        | 222.37 | 1474790    |
| 18             | <br>$\beta$ -farnesene    | 204.35 | 18794-84-8 | 42             | <br>tau-muurolol       | 222.37 | 19912-62-0 |
| 19             | <br>$\beta$ -phellandrene | 136.24 | 555-10-2   | 43             | <br>terpinen-4-ol      | 154.25 | 562-74-3   |

Table S2. Cont.

| # <sup>1</sup> | Chemical Structure and Name                                                                                    | MW     | CAS        | # <sup>1</sup> | Chemical Structure and Name                                                                               | MW     | CAS        |
|----------------|----------------------------------------------------------------------------------------------------------------|--------|------------|----------------|-----------------------------------------------------------------------------------------------------------|--------|------------|
| 20             | 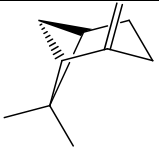<br>β-pinene                  | 136.23 | 18172-67-3 | 44             | <br>thymol              | 150.22 | 89-83-8    |
| 21             | <br>bicyclosesquiphellandrene | 204.35 | 54324-03-7 | 45             | <br>trans-2-carene-4-ol | 152.23 | 4017-82-7  |
| 22             | <br>borneol                   | 154.25 | 507-70-0   | 46             | <br>verbenone           | 150.21 | 80-57-9    |
| 23             | <br>Calamenene               | 202.34 | 483-77-2   | 47             | <br>veridiflorol       | 222.37 | 552-02-3   |
| 24             | <br>Carbitol                | 134.20 | 111-90-0   | 48             | <br>ylangene          | 204.35 | 14912-44-8 |

<sup>1</sup># indicate the compound identification number.



Table S3. Cont.

| # <sup>1</sup> | Name                | Sample <sup>2</sup> |       |       |       |       |       |       |       |       |      |      |      |       |       |       |       |       |      |
|----------------|---------------------|---------------------|-------|-------|-------|-------|-------|-------|-------|-------|------|------|------|-------|-------|-------|-------|-------|------|
|                |                     | J1h                 | J2h   | J3h   | J6h   | J12h  | J24h  | A1h   | A2h   | A3h   | A6h  | A12h | A24h | S1h   | S2h   | S3h   | S6h   | S12h  | S24h |
| 28             | copaene             |                     |       |       | 0.06  |       | 0.76  |       |       |       | 0.79 | 0.47 |      | 0.18  | 0.21  | 0.31  | 1.55  | 1.67  | 0.49 |
| 29             | cubenol             | 0.2                 |       | 1.92  | 7.46  | 6.17  | 4.24  |       |       |       | 0.36 | 0.09 | 0.04 | 0.4   | 1.77  | 0.7   | 1.44  | 0.84  | 0.18 |
| 30             | d-limonene          |                     |       |       |       |       |       | 6.22  |       |       |      |      |      | 0.69  |       |       |       |       | 4.84 |
| 31             | δ-cadinene          |                     |       |       | 0.12  |       | 4.89  | 0.09  | 0.27  | 1.07  | 2.32 | 1.54 | 0.44 | 0.89  |       | 0.14  | 3.05  | 3.33  | 1.25 |
| 32             | demelverine         | 0.59                | 0.51  | 2.18  | 9.52  | 43.46 | 20.28 | 0.13  | 1.1   | 3.14  | 7.46 | 8.82 | 5.9  | 6.23  | 0.68  | 1.84  | 2.46  | 4.9   | 5.22 |
| 33             | eucalyptol          |                     |       |       |       |       |       | 4.21  | 0.47  |       |      |      |      | 1.16  | 0.43  |       |       |       | 2.24 |
| 34             | eucarvone           | 0.08                |       |       |       |       |       |       |       |       |      |      |      |       |       |       |       |       |      |
| 35             | eugenol             |                     |       |       |       |       |       |       |       |       |      |      |      | 1.42  |       |       | 2.07  | 3.16  | 0.55 |
| 36             | gamma-cadinene      |                     |       |       |       |       | 0.86  |       |       |       | 0.51 | 0.26 | 0.06 |       |       |       |       |       |      |
| 37             | p-cymen-8-ol        | 0.12                |       |       |       |       |       | 0.21  | 0.54  | 0.66  | 0.94 | 0.97 | 0.55 | 1.67  | 9.22  | 0.37  | 26.77 | 24.68 | 4.52 |
| 38             | p-menth-1-en-8-ol   | 0.14                |       |       |       |       |       |       |       |       |      |      |      | 0.55  | 0.2   | 0.88  | 0.72  | 0.22  |      |
| 39             | p-menthone          |                     |       |       |       |       |       | 0.39  | 0.46  | 2.63  | 5.7  | 5.61 | 2.25 |       |       | 4.46  | 1.21  | 1.57  | 3.61 |
| 40             | piperitenone oxide  | 87.25               | 70.59 | 65.56 | 26.03 | 14    |       | 65.05 | 77.51 | 50.01 | 16.9 | 2.43 |      | 38.69 | 35.64 | 69.52 | 13.2  | 5.53  | 5.61 |
| 41             | tau-cadinol         |                     |       | 0.72  | 1.39  |       | 1.37  |       |       |       |      |      |      |       |       |       |       |       |      |
| 42             | tau-muurolol        |                     | 0.18  | 1.23  | 2.14  |       | 3.29  |       |       |       |      |      |      |       |       |       |       |       |      |
| 43             | terpinen-4-ol       |                     |       |       |       |       |       |       |       |       |      |      |      |       |       | 0.16  | 0.3   |       | 0.16 |
| 44             | thymol              |                     |       |       |       |       |       |       |       |       | 0.39 | 0.32 | 0.24 | 1.34  |       |       | 0.25  | 1.04  | 0.15 |
| 45             | trans-2-carene-4-ol |                     |       |       |       |       |       |       |       |       |      |      |      |       |       |       | 0.2   |       |      |
| 46             | verbenone           | 1.29                | 1.15  |       | 2.98  | 6.56  | 6.43  | 0.27  | 0.31  | 0.81  | 2.47 | 3.14 | 2.58 | 8.11  | 1.98  | 2.3   | 3.68  | 5.48  | 2.28 |
| 47             | veridiflorol        | 1.21                | 2.48  | 2.49  | 7.59  |       | 2.83  |       |       |       | 0.39 | 0.17 |      | 0.42  | 1.74  | 0.99  | 1.8   | 0.96  | 0.28 |
| 48             | ylangene            |                     |       |       |       |       |       | 0.85  | 0.43  | 1.5   | 0.64 |      |      |       |       |       | 0.83  | 0.31  | 0.46 |

<sup>1</sup># indicate the compound identification number; <sup>2</sup> Samples names were obtained by merging the month first letter and extraction time as reported in Table 1.

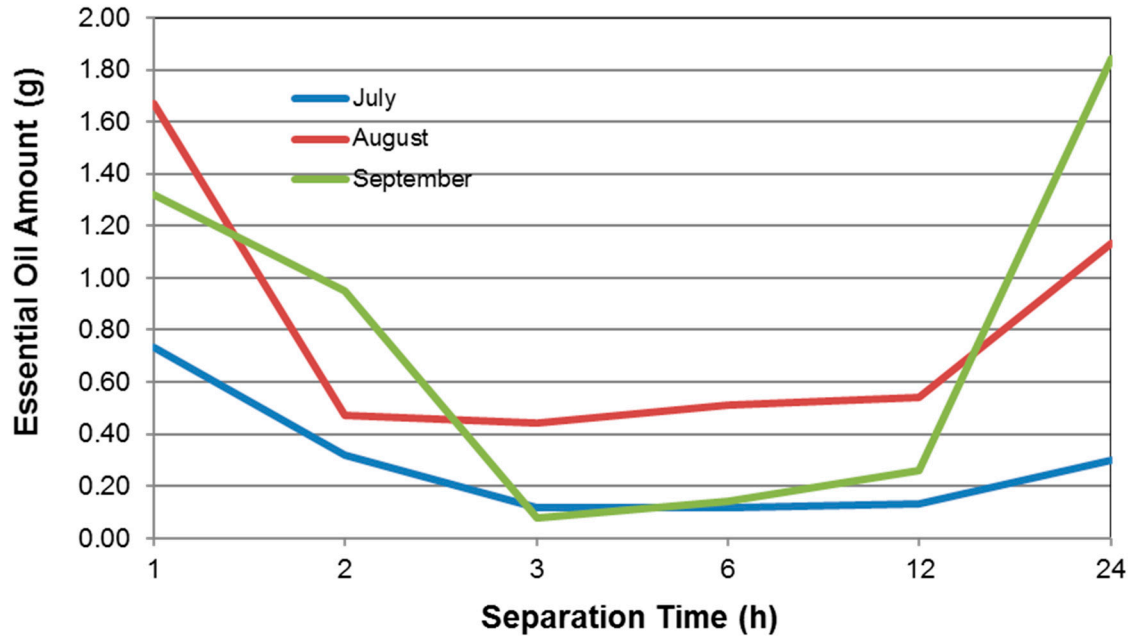

**Figure S1.** Fraction of essential oil amount during extraction at different times.

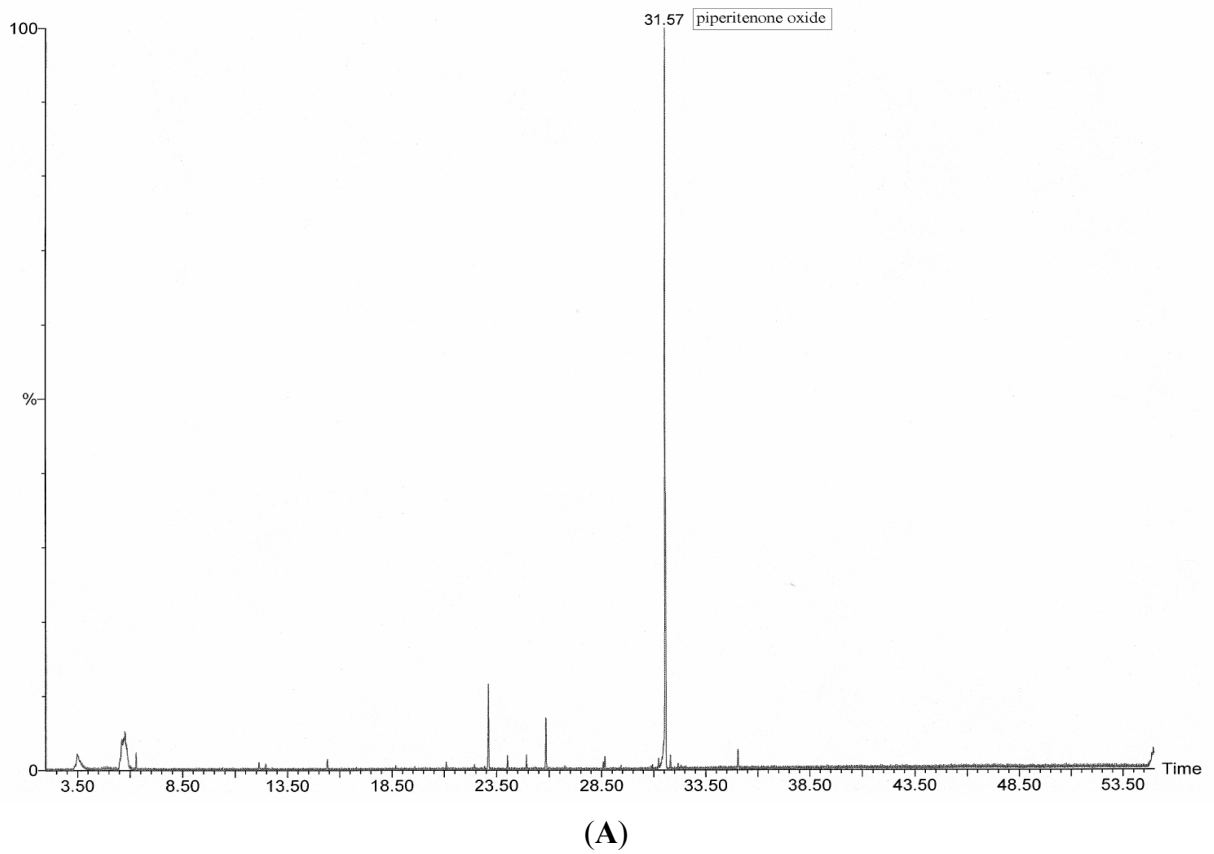

**Figure S2. Cont.**

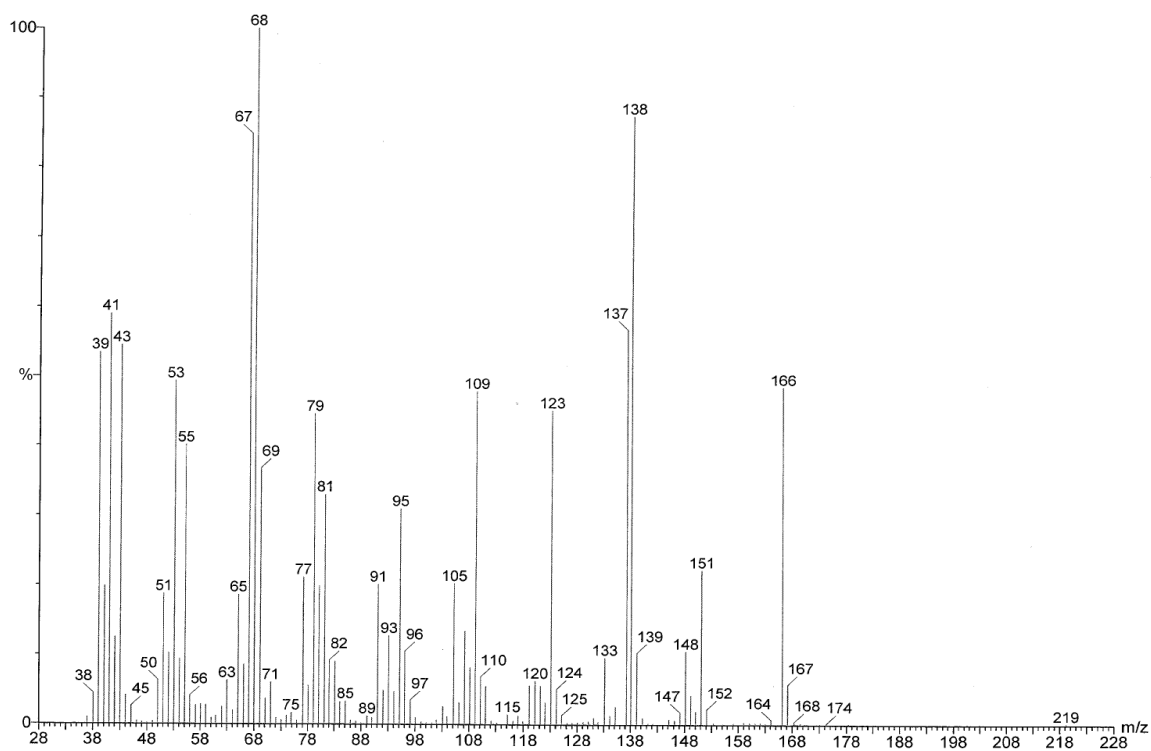

(B)

**Figure S2.** (A) Chromatogram of extract **A2h** showing piperitenone oxide as the main component; (B) Mass spectrum of the peak at retention time of 31.57 min. corresponding to piperitenone oxide.

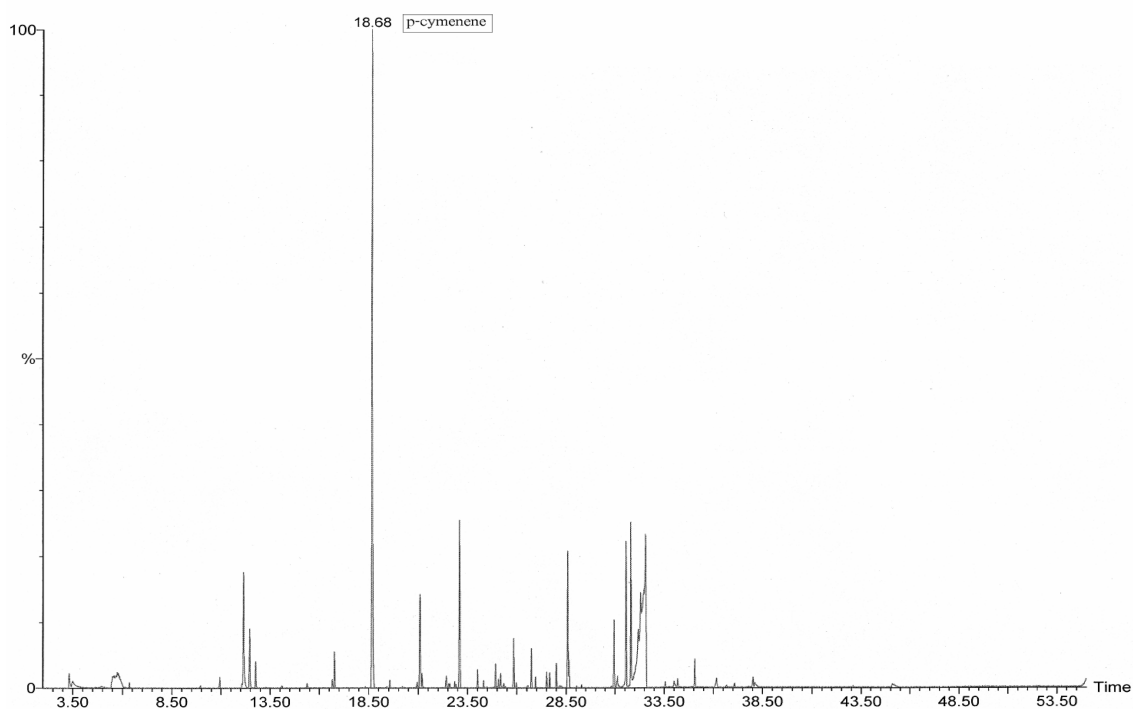

(A)

**Figure S3.** *Cont.*



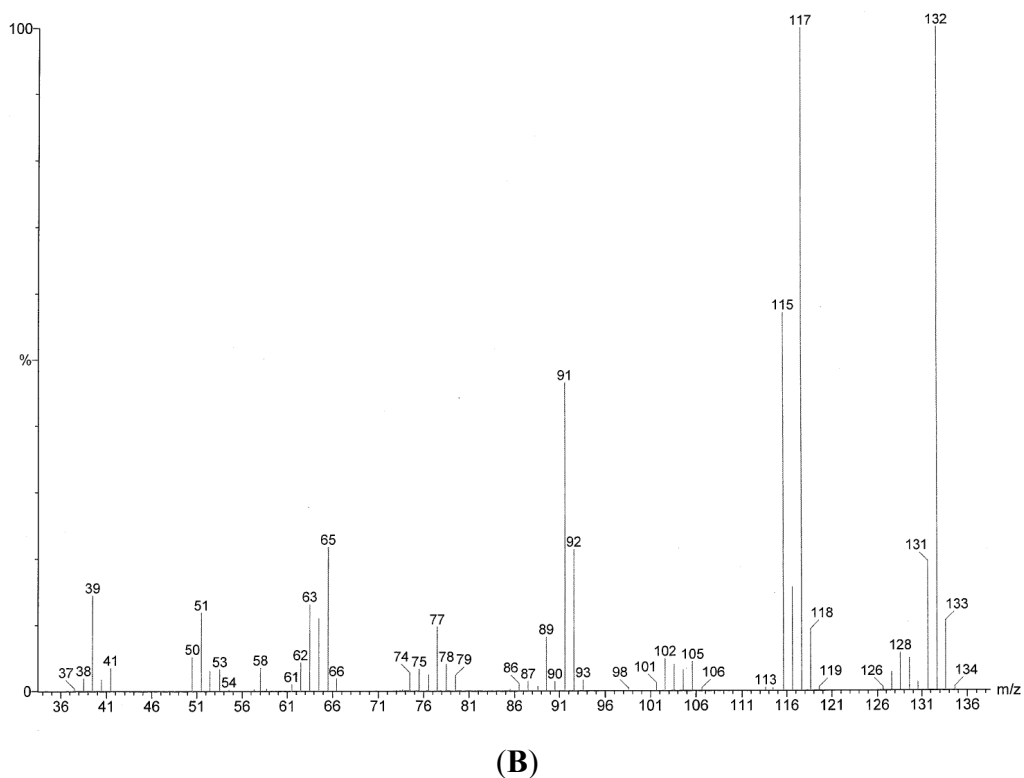

**Figure S3.** (A) Chromatogram of extract S24h showing p-cymenene as the main component; (B) Mass spectrum of the peak at retention time of 18.68 min. corresponding to p-cymenene.

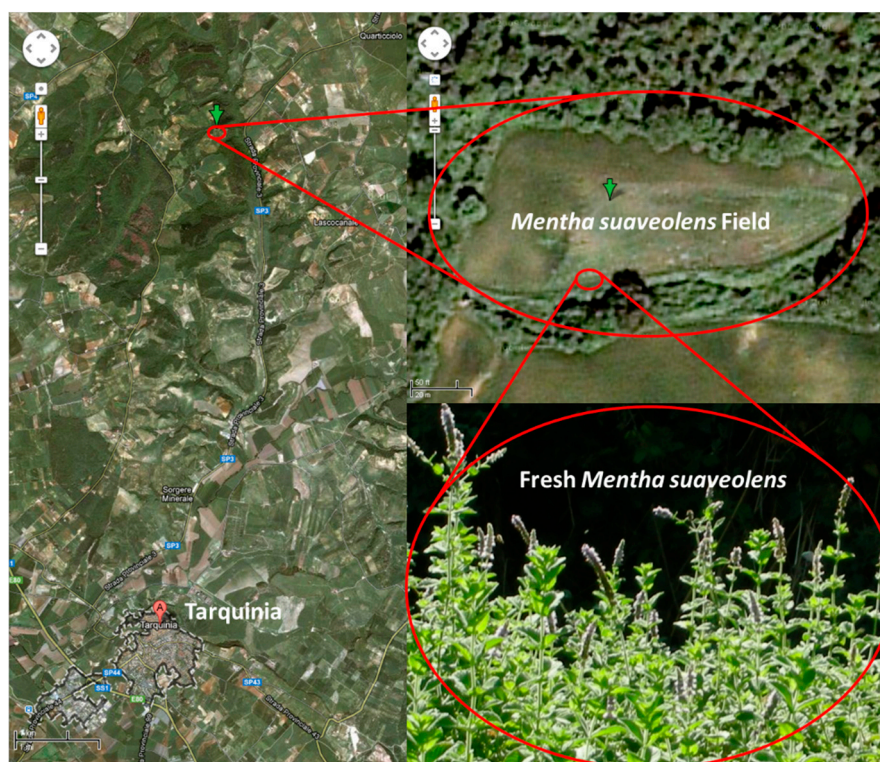

**Figure S4.** Left: Satellite view of the Tarquinia's area where plant material was collected. Right above: zoom on the field where wild *M. suaveolens* was found at world coordinates latitude 42°20'23.3406", longitude 11°46'16.3452". Right bottom: picture of fresh plant in the field.
